# Supplementary material
Source: publisher site journal article supplement (https://os.bio-protocol.org/attached/file/20191216/Supplemental%20File%201.pdf)
Supplement: Supplementary file 1 [file Supplemental%20File%201.pdf]

**Habituation/Dishabituation Test:**

Date: \_\_\_\_\_

Experimenter: \_\_\_\_\_

**Test Mouse:**

Cage #: \_\_\_\_\_ Ear Tag: \_\_\_\_\_ Weight (g): \_\_\_\_\_ Age: \_\_\_\_\_

Strain: \_\_\_\_\_ Sex: \_\_\_\_\_

**Stimulus Familiar Mouse (Trials 1-8):**

Cage #: \_\_\_\_\_ Ear Tag: \_\_\_\_\_ Weight (g): \_\_\_\_\_ Age: \_\_\_\_\_

Strain: \_\_\_\_\_ Sex: \_\_\_\_\_

**Stimulus Novel Mouse (Trial 9):**

Cage #: \_\_\_\_\_ Ear Tag: \_\_\_\_\_ Weight (g): \_\_\_\_\_ Age: \_\_\_\_\_

Strain: \_\_\_\_\_ Sex: \_\_\_\_\_

|                       | Trial 1 | Trail 2 | Trial 3 | Trial 4 | Trial 5 | Trial 6 | Trial 7 | Trial 8 | Trial 9 |
|-----------------------|---------|---------|---------|---------|---------|---------|---------|---------|---------|
| Time Stimulus Placed: |         |         |         |         |         |         |         |         |         |

Notes:
